# Supplementary material
Source: publisher figshare collection journal article supplement (https://tandf.figshare.com/ndownloader/files/12848174)
Supplement: Supplementary file 1 [file 12848174]

| Condition Name                     | Item Number | Sentence                                                                               |
|------------------------------------|-------------|----------------------------------------------------------------------------------------|
| Centre-embedded object extraction  | 1           | the reporter who the senator attacked on Tuesday ignored the president                 |
| Center-embedded subject extraction | 1           | the reporter who attacked the senator on Tuesday ignored the president                 |
| Right-branching object extraction  | 1           | the president ignored the reporter who the senator attacked on Tuesday                 |
| Right-branching subject extraction | 1           | the president ignored the reporter who attacked the senator on Tuesday                 |
| Centre-embedded object extraction  | 2           | the babysitter who the parents liked very much played with the child                   |
| Center-embedded subject extraction | 2           | the babysitter who liked the parents very much played with the child                   |
| Right-branching object extraction  | 2           | the child played with the babysitter who the parents liked very much                   |
| Right-branching subject extraction | 2           | the child played with the babysitter who liked the parents very much                   |
| Centre-embedded object extraction  | 3           | the banker who the chairman praised during the lunch distrusted the broker             |
| Center-embedded subject extraction | 3           | the banker who praised the chairman during the lunch distrusted the broker             |
| Right-branching object extraction  | 3           | the broker distrusted the banker who the chairman praised during the lunch             |
| Right-branching subject extraction | 3           | the broker distrusted the banker who praised the chairman during the lunch             |
| Centre-embedded object extraction  | 4           | the violinist who the sponsors flattered at the rehearsal insulted the singer          |
| Center-embedded subject extraction | 4           | the violinist who flattered the sponsors at the rehearsal insulted the singer          |
| Right-branching object extraction  | 4           | the singer insulted the violinist who the sponsors flattered at the rehearsal          |
| Right-branching subject extraction | 4           | the singer insulted the violinist who flattered the sponsors at the rehearsal          |
| Centre-embedded object extraction  | 5           | the burgler who the police negotiated with on Monday had frightened the dog            |
| Center-embedded subject extraction | 5           | the burgler who negotiated with the police on Monday had frightened the dog            |
| Right-branching object extraction  | 5           | the dog had frightened the burgler who the police negotiated with on Monday            |
| Right-branching subject extraction | 5           | the dog had frightened the burgler who negotiated with the police on Monday            |
| Centre-embedded object extraction  | 6           | the carpenter who the plumber punched in the nose yelled at the painter                |
| Center-embedded subject extraction | 6           | the carpenter who punched the plumber in the nose yelled at the painter                |
| Right-branching object extraction  | 6           | the painter yelled at the carpenter who the plumber punched in the nose                |
| Right-branching subject extraction | 6           | the painter yelled at the carpenter who punched the plumber in the nose                |
| Centre-embedded object extraction  | 7           | the accountant who the engineer advised during the meeting spoke to the secretary      |
| Center-embedded subject extraction | 7           | the accountant who advised the engineer during the meeting spoke to the secretary      |
| Right-branching object extraction  | 7           | the secretary spoke to the accountant who the engineer advised during the meeting      |
| Right-branching subject extraction | 7           | the secretary spoke to the accountant who advised the engineer during the meeting      |
| Centre-embedded object extraction  | 8           | the model who the artist teased after the debut winked at the journalist               |
| Center-embedded subject extraction | 8           | the model who teased the artist after the debut winked at the journalist               |
| Right-branching object extraction  | 8           | the journalist winked at the model who the artist teased after the debut               |
| Right-branching subject extraction | 8           | the journalist winked at the model who teased the artist after the debut               |
| Centre-embedded object extraction  | 9           | the student who the professor trusted for a long time met with the provost             |
| Center-embedded subject extraction | 9           | the student who trusted the professor for a long time met with the provost             |
| Right-branching object extraction  | 9           | the provost met with the student who the professor trusted for a long time             |
| Right-branching subject extraction | 9           | the provost met with the student who trusted the professor for a long time             |
| Centre-embedded object extraction  | 10          | the mobster who the media criticized on Monday kidnapped the spy                       |
| Center-embedded subject extraction | 10          | the mobster who criticized the media on Monday kidnapped the spy                       |
| Right-branching object extraction  | 10          | the spy kidnapped the mobster who the media criticized on Monday                       |
| Right-branching subject extraction | 10          | the spy kidnapped the mobster who criticized the media on Monday                       |
| Centre-embedded object extraction  | 11          | the player who the coach screamed at after practice wrestled with the trainer          |
| Center-embedded subject extraction | 11          | the player who screamed at the coach after practice wrestled with the trainer          |
| Right-branching object extraction  | 11          | the trainer wrestled with the player who the coach screamed at after practice          |
| Right-branching subject extraction | 11          | the trainer wrestled with the player who screamed at the coach after practice          |
| Centre-embedded object extraction  | 12          | the actor who the starlet annoyed a great deal forgot about the leading lady           |
| Center-embedded subject extraction | 12          | the actor who annoyed the starlet a great deal forgot about the leading lady           |
| Right-branching object extraction  | 12          | the leading lady forgot about the actor who the starlet annoyed a great deal           |
| Right-branching subject extraction | 12          | the leading lady forgot about the actor who annoyed the starlet a great deal           |
| Centre-embedded object extraction  | 13          | the criminal who the lawyer sued for millions of dollars stared at the judge           |
| Center-embedded subject extraction | 13          | the criminal who sued the lawyer for millions of dollars stared at the judge           |
| Right-branching object extraction  | 13          | the judge stared at the criminal who the lawyer sued for millions of dollars           |
| Right-branching subject extraction | 13          | the judge stared at the criminal who sued the lawyer for millions of dollars           |
| Centre-embedded object extraction  | 14          | the suitors who the king entertained during the evening wanted to see the princess     |
| Center-embedded subject extraction | 14          | the suitors who entertained the king during the evening wanted to see the princess     |
| Right-branching object extraction  | 14          | the princess wanted to see the suitors who the king entertained during the evening     |
| Right-branching subject extraction | 14          | the princess wanted to see the suitors who entertained the king during the evening     |
| Centre-embedded object extraction  | 15          | the bachelor who the socialite pursued with passion resented the millionaire           |
| Center-embedded subject extraction | 15          | the bachelor who pursued the socialite with passion resented the millionaire           |
| Right-branching object extraction  | 15          | the millionaire resented the bachelor who the socialite pursued with passion           |
| Right-branching subject extraction | 15          | the millionaire resented the bachelor who pursued the socialite with passion           |
| Centre-embedded object extraction  | 16          | the councillor who the radio host provoked last week married the secretary             |
| Center-embedded subject extraction | 16          | the councillor who provoked the radio host last week married the secretary             |
| Right-branching object extraction  | 16          | the secretary married the councillor who the radio host provoked last week             |
| Right-branching subject extraction | 16          | the secretary married the councillor who provoked the radio host last week             |
| Centre-embedded object extraction  | 17          | the contestant who the judges joked with about the host turned towards the cameraman   |
| Center-embedded subject extraction | 17          | the contestant who joked with the judges about the host turned towards the cameraman   |
| Right-branching object extraction  | 17          | the cameraman turned towards the contestant who the judges joked with about the host   |
| Right-branching subject extraction | 17          | the cameraman turned towards the contestant who joked with the judges about the host   |
| Centre-embedded object extraction  | 18          | the child who the psychologist talked to during the therapy session had hurt the woman |
| Center-embedded subject extraction | 18          | the child who talked to the psychologist during the therapy session had hurt the woman |
| Right-branching object extraction  | 18          | the woman had hurt the child who the psychologist talked to during the therapy session |
| Right-branching subject extraction | 18          | the woman had hurt the child who talked to the psychologist during the therapy session |
| Centre-embedded object extraction  | 19          | the diplomat who the prime minister insulted on Friday angered the dictator            |
| Center-embedded subject extraction | 19          | the diplomat who insulted the prime minister on Friday angered the dictator            |
| Right-branching object extraction  | 19          | the dictator angered the diplomat who the prime minister insulted on Friday            |
| Right-branching subject extraction | 19          | the dictator angered the diplomat who insulted the prime minister on Friday            |
| Centre-embedded object extraction  | 20          | the tourists who the guide walked with during the visit waved at the nuns              |
| Center-embedded subject extraction | 20          | the tourists who walked with the guide during the visit waved at the nuns              |
| Right-branching object extraction  | 20          | the nuns waved at the tourists who the guide walked with during the visit              |
| Right-branching subject extraction | 20          | the nuns waved at the tourists who walked with the guide during the visit              |
| Centre-embedded object extraction  | 21          | the politician who the voters spoke to during the campaign smiled at the preacher      |
| Center-embedded subject extraction | 21          | the politician who spoke to the voters during the campaign smiled at the preacher      |
| Right-branching object extraction  | 21          | the preacher smiled at the politician who the voters spoke to during the campaign      |
| Right-branching subject extraction | 21          | the preacher smiled at the politician who spoke to the voters during the campaign      |
| Centre-embedded object extraction  | 22          | the farmer who the aliens had communicated with at dusk phoned the newspaper           |
| Center-embedded subject extraction | 22          | the farmer who had communicated with the aliens at dusk phoned the newspaper           |
| Right-branching object extraction  | 22          | the newspaper phoned the farmer who the aliens had communicated with at dusk           |
| Right-branching subject extraction | 22          | the newspaper phoned the farmer who had communicated with the aliens at dusk           |
| Centre-embedded object extraction  | 23          | the official who the governor argued with very loudly avoided the mayor                |
| Center-embedded subject extraction | 23          | the official who argued with the governor very loudly avoided the mayor                |
| Right-branching object extraction  | 23          | the mayor avoided the official who the governor argued with very loudly                |
| Right-branching subject extraction | 23          | the mayor avoided the official who argued with the governor very loudly                |
| Centre-embedded object extraction  | 24          | the clerk who the manager disliked very much smiled at the customer                    |
| Center-embedded subject extraction | 24          | the clerk who disliked the manager very much smiled at the customer                    |
| Right-branching object extraction  | 24          | the customer smiled at the clerk who the manager disliked very much                    |
| Right-branching subject extraction | 24          | the customer smiled at the clerk who disliked the manager very much                    |
| Centre-embedded object extraction  | 25          | the guitarist who the band played with at concerts despised the agent                  |
| Center-embedded subject extraction | 25          | the guitarist who played with the band at concerts despised the agent                  |
| Right-branching object extraction  | 25          | the agent despised the guitarist who the band played with at concerts                  |
| Right-branching subject extraction | 25          | the agent despised the guitarist who played with the band at concerts                  |
| Centre-embedded object extraction  | 26          | the salesman who the cashier resented for stealing merchandise ridiculed the shoppers  |
| Center-embedded subject extraction | 26          | the salesman who resented the cashier for stealing merchandise ridiculed the shoppers  |
| Right-branching object extraction  | 26          | the shoppers ridiculed the salesman who the cashier resented for stealing merchandise  |
| Right-branching subject extraction | 26          | the shoppers ridiculed the salesman who resented the cashier for stealing merchandise  |
| Centre-embedded object extraction  | 27          | the waiter who the cook despised for being lazy ignored the assistant                  |
| Center-embedded subject extraction | 27          | the waiter who despised the cook for being lazy ignored the assistant                  |
| Right-branching object extraction  | 27          | the assistant ignored the waiter who the cook despised for being lazy                  |
| Right-branching subject extraction | 27          | the assistant ignored the waiter who despised the cook for being lazy                  |
| Centre-embedded object extraction  | 28          | the nurse who the doctor worked with on the weekends scolded the patient               |
| Center-embedded subject extraction | 28          | the nurse who worked with the doctor on the weekends scolded the patient               |
| Right-branching object extraction  | 28          | the patient scolded the nurse who the doctor worked with on the weekends               |
| Right-branching subject extraction | 28          | the patient scolded the nurse who worked with the doctor on the weekends               |
| Centre-embedded object extraction  | 29          | the passenger who the navigator had met at the party talked to the pilot               |
| Center-embedded subject extraction | 29          | the passenger who had met the navigator at the party talked to the pilot               |
| Right-branching object extraction  | 29          | the pilot talked to the passenger who the navigator had met at the party               |
| Right-branching subject extraction | 29          | the pilot talked to the passenger who had met the navigator at the party               |
| Centre-embedded object extraction  | 30          | the dog which the bear chased up the tree scratched the cubs                           |
| Center-embedded subject extraction | 30          | the dog which chased the bear up the tree scratched the cubs                           |
| Right-branching object extraction  | 30          | the cubs scratched the dog which the bear chased up the tree                           |
| Right-branching subject extraction | 30          | the cubs scratched the dog which chased the bear up the tree                           |
| Centre-embedded object extraction  | 31          | the cheerleader who the footballer dated for a month denounced the rugby star          |
| Center-embedded subject extraction | 31          | the cheerleader who dated the footballer for a month denounced the rugby star          |
| Right-branching object extraction  | 31          | the rugby star denounced the cheerleader who the footballer dated for a month          |
| Right-branching subject extraction | 31          | the rugby star denounced the cheerleader who dated the footballer for a month          |
| Centre-embedded object extraction  | 32          | the raccoon which the fox bit on the leg ran from the deer                             |
| Center-embedded subject extraction | 32          | the raccoon which bit the fox on the leg ran from the deer                             |
| Right-branching object extraction  | 32          | the deer ran from the raccoon which the fox bit on the leg                             |
| Right-branching subject extraction | 32          | the deer ran from the raccoon which bit the fox on the leg                             |
